# Supplementary material for: Can Zeolite-Supporting Acridines Boost Their Anticancer Performance?
Source: J Funct Biomater. 2023 Mar 22;14(3):173. doi: 10.3390/jfb14030173 (PMC10056282; doi:10.3390/jfb14030173)
Supplement: Supplementary file 1 [file jfb-14-00173-s001.zip › jfb-2276252-supplementary.pdf]

## Supplementary Materials

### Can zeolite-supporting acridines boost their anticancer performance?

Maja Ranković<sup>a</sup>, Anka Jevremović<sup>a</sup>, Aleksandra Janošević Ležaić<sup>b</sup>, Aleksandar Arsenijević<sup>c</sup>, Jelena Rugar<sup>b</sup>, Vladimir Dobričić<sup>b</sup>, Bojana Nedić Vasiljević<sup>a</sup>, Nemanja Gavrilov<sup>a</sup>, Danica Bajuk-Bogdanović<sup>a</sup>, Maja Milojević-Rakić<sup>a</sup>

<sup>a</sup>University of Belgrade–Faculty of Physical Chemistry, 11000 Belgrade, Serbia.

<sup>b</sup>University of Belgrade–Faculty of Pharmacy, Department of Physical Chemistry and Instrumental Methods, 11221 Belgrade, Serbia

<sup>c</sup>University of Kragujevac–Faculty of Medical Sciences, Department of Pharmacy and Center for molecular medicine and stem cells research, 34000 Kragujevac, Serbia

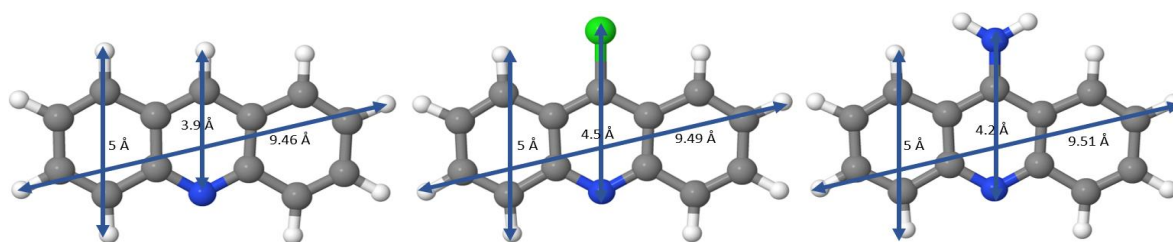

**Figure S1.** MolView presentation (H – white, C – grey, Cl – green, N – blue) and assessment of acridines dimensions.

**Table S1.** Solvation enthalpy for tested acridines calculated from heat of formation with and without solvation sphere.

|                             | Heat of formation/kcal per mol |        |       |
|-----------------------------|--------------------------------|--------|-------|
|                             | Acr                            | 9ClAcr | 9NAcr |
| <b>No solvation</b>         | 71.7                           | 62.5   | 69.2  |
| <b>Solvation</b>            | 63.0                           | 56.2   | 53.4  |
| <b>Dielectric part / eV</b> | -0.44                          | -0.34  | -1.03 |
